# Supplementary material for: Early Transcriptome Signatures from Immunized Mouse Dendritic Cells Predict Late Vaccine-Induced T-Cell Responses
Source: PubMed Central journal article supplement (PMC4801398; doi:10.1371/journal.pcbi.1004801), 2016-03-21
Supplement: pcbi.1004801.s001.pdf [file pcbi.1004801.s001.pdf]

**S1 Table: List of studied vectors.**

| Vector ID (a) | Vector platform                         | gp33/41 T-cell response (b) | Microarray (c) |
|---------------|-----------------------------------------|-----------------------------|----------------|
| ADN_1         | DNA                                     | Yes                         |                |
| ADN_2         | DNA                                     | Yes                         |                |
| ADN_3         | DNA                                     | Yes                         |                |
| ADN_4         | DNA                                     | Yes                         |                |
| AP205_1       | VLP bacteriophage                       | Yes                         | DC/SPL*/PBMC*  |
| AP205_1bis    | VLP bacteriophage                       | Yes                         | DC             |
| AP205_3       | VLP bacteriophage                       |                             | DC             |
| AP205_4       | VLP bacteriophage                       | Yes                         |                |
| AP205_5       | VLP bacteriophage                       | Yes                         |                |
| AP205_6       | VLP bacteriophage                       | Yes                         |                |
| AP205_7       | VLP bacteriophage                       | Yes                         |                |
| BCG_1         | BCG-derived bacterial vector            | Yes                         | DC             |
| BCG_2         | BCG-derived bacterial vector            |                             | DC             |
| BCG_3         | BCG-derived bacterial vector            |                             | DC             |
| BCG_4         | BCG-derived bacterial vector            | Yes                         |                |
| HBC_1         |                                         | Yes                         |                |
| HBC_2         |                                         | Yes                         |                |
| HBC_3         |                                         | Yes                         |                |
| MLV_1         | VLP Moloney murine leukaemia retrovirus | Yes                         | DC/SPL*/PBMC*  |
| MLV_2         | VLP Moloney murine leukaemia retrovirus |                             | DC             |
| MPT_1         | VLP murine pneumotropic virus           | Yes                         | DC/SPL*/PBMC*  |
| MPT_2         | VLP murine pneumotropic virus           | Yes                         |                |
| MPT_3         | VLP murine pneumotropic virus           | Yes                         |                |
| MPY_1         | VLP murine polyomavirus                 | Yes                         | DC             |
| MPY_2         | VLP murine polyomavirus                 | Yes                         | DC             |
| MPY_3         | VLP murine polyomavirus                 |                             | DC             |
| MPY_3bis      | VLP murine polyomavirus                 |                             | DC             |
| MVA_1         | Modified vaccinia Ankara                | Yes                         | DC/SPL*/PBMC*  |
| MVA_2         | Modified vaccinia Ankara                |                             | DC             |
| MVA_2bis      | Modified vaccinia Ankara                |                             | DC             |
| MVA_3         | Modified vaccinia Ankara                | Yes                         |                |
| LV_1          | Lentivirus                              | Yes                         | DC*            |
| LV_2          | Lentivirus                              | Yes                         | DC*            |
| Plasmo_1      |                                         | Yes                         |                |
| Plasmo_2      |                                         | Yes                         |                |
| Plasmo_3      |                                         | Yes                         |                |
| Plasmo_4      |                                         | Yes                         |                |
| Plasmo_6      |                                         | Yes                         |                |
| QB_1          | Qb bacteriophage                        | Yes                         | PBMC*          |
| QB_2          | Qb bacteriophage                        | Yes                         | PBMC*          |
| QB_3          | Qb bacteriophage                        | Yes                         | PBMC*          |
| QB_4          | Qb bacteriophage                        | Yes                         | PBMC*          |
| QB_5          | Qb bacteriophage                        | Yes                         | PBMC*          |
| QB_6          | Qb bacteriophage                        | Yes                         |                |
| rAd_1         | Adenovirus                              | Yes                         | DC/SPL*        |
| rAd_1bis      | Adenovirus                              |                             | DC             |
| rAd_2bis      | Adenovirus                              |                             | DC             |
| rAd_3         | Adenovirus                              |                             | DC             |
| rAd_3bis      | Adenovirus                              |                             | DC             |
| rAd_4         | Adenovirus                              | Yes                         |                |
| rAd_5         | Adenovirus                              | Yes                         |                |
| VACC_1        | Vaccinia                                | Yes                         |                |
| VACC_2        | Vaccinia                                | Yes                         |                |

- (a) Numbers refer to independent vector preparations; “bis” corresponds to a duplicate analysis of the same corresponding batch.
- (b) This column indicates the 41 vectors for which the gp33-41 specific T-cell response was assessed.
- (c) This column indicates vectors for which sorted spleen dendritic cells (DC), whole spleen (SPL) and/or PBMC microarray data are available. Microarray datasets were produced with CodeLink except those marked by an asterisk produced with Illumina. Except for the AP205\_3, MLV\_2, LV\_1 and LV\_2 datasets, which were generated for validation purposes, the other 19 DC datasets were used in the training set.
